# Supplementary material for: Location-Specific Responses to Thermal Stress in Larvae of the Reef-Building Coral Montastraea faveolata
Source: PLoS One. 2010 Jun 23;5(6):e11221. doi: 10.1371/journal.pone.0011221 (PMC2890407; doi:10.1371/journal.pone.0011221)
Supplement: Table S1 — Transcripts of M. faveolata embryos differentially expressed between the two treatment temperatures at both study locations. Up and downregulation is in relation to a common reference sample. Log2 fold change values in bold indicate significant results. Gene ID: NCBI EST database access number. (0.04 MB XLS) [file pone.0011221.s001.xls]

## Sheet: TableS1
		Log2 Fold Change
		Mexico		Florida
Direction	Genes ID	Day1	Day2	Day1	Day2	Process	Annotation
Down	AOSB1012	0.94	-0.755	-0.75	-0.659	RNA, mRNA modification	Serine/arginine repetitive matrix protein 1
	AOSB1116	-0.036	-0.608	-0.624	-0.397	cell proliferation, growth, development	Disks large-associated protein 5
	AOSC1104	-0.311	-0.625	-0.578	-0.423	proteolysis, protein degradation	26S proteasome non-ATPase regulatory subunit 2
	AOSC1120	-0.633	-0.53	-0.497	-0.578	translation, protein biosynthesis	Elongation factor 1-alpha
	AOSC403	-0.009	-0.584	-0.604	-0.54	response to oxidative stress	2Fe-2S ferredoxin, iron-sulphur binding site
	AOSC471	-0.113	-0.631	0.027	-0.526	-	-
	AOSC486	-0.132	-0.689	0.034	-0.657	-	-
	AOSC617	0.546	-0.918	0.21	-1.422	response to stress	Heat shock protein HSP 90-alpha
	AOSC865	0.55	-0.828	-1.246	-1.072	apoptosis	Peptide methionine sulfoxide reductase
	AOSC952	-0.04	-0.617	-0.042	-0.639	-	-
	AOSF1077	-0.189	-1.122	-0.345	-1.041	RNA, mRNA modification	NHP2-like protein 1
	AOSF1116	0.041	-1.007	0.137	-0.745	signaling	tbc domain containing protein
	AOSF1152	-0.219	-0.836	-0.578	-0.752	-	hypothetical protein Nwi_2788
	AOSF1178	0.511	-0.716	-0.563	-1.453	proteolysis, protein degradation	leishmanolysin family protein
	AOSF1208	0.433	-0.708	-0.715	-0.602	-	-
	AOSF1219	-0.556	-1.712	-1.053	-1.442	DNA	Histone H3.3
	AOSF1233	-0.21	-0.757	-0.222	-1.291	DNA	Histone H3.3
	AOSF1247	-0.248	-0.513	-0.191	-0.78	proteolysis, protein degradation	Cullin-1
	AOSF1434	-0.192	-1.568	0.056	-1.52	cell proliferation, growth, development	Piwi-like protein 1
	AOSF449	0.431	-0.555	-0.973	-0.472	-	-
	AOSF533	-0.181	-0.868	-0.484	-1.585	response to stress	Transcription factor HES-1
	AOSF573	-1.233	-1.911	0.328	-0.898	cell proliferation, growth, development	Calmodulin
	AOSF620	-0.45	-0.818	-0.473	-0.638	translation, protein biosynthesis	Eukaryotic initiation factor 4A-II
	AOSF622	-0.961	-2.67	-0.592	-1.833	DNA	Histone H2A.V (Fragment)
	AOSF634	-0.493	-1.043	0.008	-0.616	cytoskeleton, cell adhesion	Dynein light chain Tctex-type 1
	AOSF645	-0.342	-0.705	0.336	-0.964	cytoskeleton, cell adhesion	protein o-fucosyltransferase 1
	AOSF715	-0.297	-1.044	0.718	-0.541	-	-
	AOSF756	-0.136	-0.578	-0.387	-0.999	-	-
	AOSF761	-0.537	-0.957	0.577	-0.675	apoptosis	Proapoptotic caspase adapter protein
	AOSF912	-0.316	-1.335	-0.518	-1.151	cell proliferation, growth, development	GTP-binding nuclear protein Ran
	AOSF931	-0.056	-1.045	-0.542	-0.744	-	-
	AOSF996	-0.229	-0.504	-0.078	-0.615	-	-
	CAON1064	-0.099	-0.656	-0.536	-0.872	-	-
	CAON1684	-0.077	-0.714	-0.609	-1.048	-	-
	CAON395	0.282	-1.036	-0.611	-0.844	-	-
Up	AOSB442	0.67	0.555	-0.619	0.864	-	gem (nuclear organelle) associated protein 4
	AOSB596	0.658	0.852	-0.96	1.032	cell proliferation, growth, development	Nuclear hormone receptor family member nhr-6
	AOSC675	-0.032	1.482	0.17	1.779	-	-
	AOSF1012	0.435	0.908	-0.726	0.973	cytoskeleton, cell adhesion	nck-associated protein 1
	AOSF1104	-0.069	3.053	0.015	2.907	-	-
	AOSF1169	0.837	1.414	-0.01	1.541	-	-
	AOSF1235	-0.235	1.098	0.279	1.823	-	-
	AOSF1331	0.443	0.762	-0.382	0.972	-	-
	AOSF1341	0.298	0.664	0.355	0.564	apoptosis	Growth hormone-inducible transmembrane protein
	AOSF1532	-0.526	2.085	1.544	2.029	-	Uncharacterized protein At1g14870
	AOSF521	-0.14	0.678	0.169	0.686	-	-
	AOSF561	-0.618	0.676	0.544	1.288	-	orf2-encoded protein
	AOSF608	-0.095	0.599	0.499	0.582	-	-
	AOSF621	0.353	2.574	0.125	0.674	metabolism	DBH-like monooxygenase protein 2 homolog
	AOSF703	-0.057	0.551	0.213	0.69	-	-
	AOSF802	0.46	0.957	0.279	0.943	-	-
	AOSF882	-0.312	1.251	0.435	0.981	regulation of transcription	CCAAT/enhancer-binding protein gamma
	AOSF987	-0.276	0.74	0.522	1.111	transport	ATP-binding cassette sub-family F member 3
	AOSF997	-1.143	3.902	0.901	0.269	response to oxidative stress	Peroxidasin-like protein
	CAON1646	0.174	0.724	0.621	-0.402	metabolism	Nucleoside diphosphate kinase B
	CAON484	0.653	0.548	-0.591	0.702	-	-
	CAON582	-0.246	0.977	-0.178	0.579	-	-
	CAON592	0.692	1.195	0.003	0.536	-	-
	CAON604	-0.145	1.837	0.073	1.539	-	-
	CAON867	0.18	1.124	0.312	0.538	-	-
	CAOO902	0.866	1.267	0.702	0.355	translation, protein biosynthesis	Elongation factor 1-alpha 2
