# Supplementary material for: Location-Specific Responses to Thermal Stress in Larvae of the Reef-Building Coral Montastraea faveolata
Source: PLoS One. 2010 Jun 23;5(6):e11221. doi: 10.1371/journal.pone.0011221 (PMC2890407; doi:10.1371/journal.pone.0011221)
Supplement: Table S2 — Transcripts of M. faveolata embryos differentially expressed between the two treatment temperatures at only one study location. Up and downregulation is in relation to a common reference sample. Log2 fold change values presented for significant differences only. Gene ID: NCBI EST database access number. (0.08 MB XLS) [file pone.0011221.s002.xls]

## Sheet: TableS2
				Log2 Fold Change
Location	Direction	Day	Genes ID	Day 1	Day 2	Process	Annotation
Florida	Down	Day 1	AOSB1002	-0.735		-	-
			AOSB1012	-0.75		RNA, mRNA modification	Serine/arginine repetitive matrix protein 1
			AOSB1020	-0.83		cell proliferation, growth, development	SAPS domain family member 3
			AOSB1074	-1.43		-	Putative golgin subfamily A member 6-like protein 4
			AOSB1088	-0.531		cytoskeleton, cell adhesion	Dystrophin
			AOSB1100	-0.649		RNA, mRNA modification	U4/U6 small nuclear ribonucleoprotein Prp3
			AOSB1116	-0.624		cell proliferation, growth, development	Disks large-associated protein 5
			AOSB445	-0.715		metabolism	Glyoxylate reductase
			AOSB564	-0.537		cytoskeleton, cell adhesion	Integral membrane protein DGCR2/IDD
			AOSB586	-0.54		regulation of transcription	transcriptional regulator interacting with the PHD-bromodomain 2
			AOSB596	-0.96		cell proliferation, growth, development	Nuclear hormone receptor family member nhr-6
			AOSB717	-0.608		-	-
			AOSB745	-0.518		RNA, mRNA modification	Pre-mRNA-splicing factor SPF27
			AOSB764	-0.804		proteolysis, protein degradation	26S proteasome non-ATPase regulatory subunit 2
			AOSC1032	-0.575		-	-
			AOSC1104	-0.578		proteolysis, protein degradation	26S proteasome non-ATPase regulatory subunit 2
			AOSC1115	-0.767		DNA	tar1_klula protein tar1
			AOSC1123	-0.633		-	-
			AOSC1134	-0.583		transport	Syntaxin-16
			AOSC398	-0.559		-	-
			AOSC401	-0.633		-	predicted protein
			AOSC403	-0.604		response to oxidative stress	2Fe-2S ferredoxin, iron-sulphur binding site
			AOSC783	-0.716		-	-
			AOSC786	-1.035		-	-
			AOSC797	-0.636		regulation of transcription	Krueppel-like factor 7
			AOSC820	-0.524		-	-
			AOSC845	-1.016		-	hypothetical protein [Mus musculus]
			AOSC864	-0.71		cell proliferation, growth, development	Lethal(2) giant larvae protein homolog 2
			AOSC865	-1.246		apoptosis	Peptide methionine sulfoxide reductase
			AOSC957	-0.687		regulation of transcription	Protein FEV
			AOSF1137	-0.505		-	-
			AOSF1147	-0.53		-	-
			AOSF1165	-1.864		-	-
			AOSF1184	-0.559		-	novel immunoglobulin domain containing protein
			AOSF1208	-0.715		-	-
			AOSF1219	-1.053		DNA	Histone H3.3
			AOSF1266	-0.652		-	-
			AOSF1291	-1.043		regulation of transcription	Homeobox protein SIX1
			AOSF1305	-0.552		-	-
			AOSF1363	-0.662		-	hypothetical protein [Strongylocentrotus purpuratus]
			AOSF1442	-0.91		-	-
			AOSF1525	-1.587		-	similar to predicted protein [Strongylocentrotus purpuratus]
			AOSF449	-0.973		-	-
			AOSF495	-0.783		-	-
			AOSF516	-1.66		-	-
			AOSF528	-0.97		response to stress	Chaperonin Cpn60
			AOSF544	-0.607		-	-
			AOSF684	-0.747		-	-
			AOSF737	-0.777		-	-
			AOSF752	-0.869		-	lymphocyte antigen 6locus d
			AOSF861	-0.636		-	Tyrosine-protein phosphatase 1
			AOSF912	-0.518		cell proliferation, growth, development	GTP-binding nuclear protein Ran
			AOSF931	-0.542		-	-
			CAON1064	-0.536		-	-
			CAON1200	-0.501		-	-
			CAON1207	-0.635		-	-
			CAON1268	-0.695		-	-
			CAON1315	-1.08		-	-
			CAON1684	-0.609		-	-
			CAON1804	-0.538		-	-
			CAON395	-0.611		-	-
			CAON436	-0.586		-	-
			CAON580	-0.571		signaling	Leucine-rich repeat protein SHOC-2
			CAON609	-0.58		-	-
			CAON980	-0.504		proteolysis, protein degradation	Zinc metalloproteinase nas-13
			CAOO2097	-0.932		-	hypothetical protein
			CAOO532	-0.639		-	tar1_yeast protein tar1 (transcript antisense to ribosomal rna protein 1)
			CAOO703	-0.834		response to stress	senescence-associated protein
		Day 2	AOSB1028		-0.905	proteolysis, protein degradation	Ubiquitin-conjugating enzyme E2 S
			AOSB1124		-0.805	-	hypothetical protein CHGG_05731
			AOSB399		-1.154	-	predicted protein [Nematostella vectensis]
			AOSB460		-1.23	response to stress	Stress response protein nst1
			AOSB472		-1.84	proteolysis, protein degradation	Ubiquitin carboxyl-terminal hydrolase 5
			AOSB563		-0.661	-	-
			AOSB638		-1.302	RNA, mRNA modification	Intron-binding protein aquarius
			AOSB684		-1.262	-	-
			AOSC792		-1.588	-	-
			AOSC845		-0.872	-	hypothetical protein [Mus musculus]
			AOSF1159		-0.966	translation, protein biosynthesis	Lysyl-tRNA synthetase
			AOSF1165		-1.218	-	-
			AOSF1224		-0.977	-	-
			AOSF1266		-0.644	-	-
			AOSF1299		-0.898	-	-
			AOSF1305		-0.533	-	-
			AOSF1397		-0.85	-	N-acetylglucosaminyl-phosphatidylinositol de-N-acetylase
			AOSF433		-1.008	-	-
			AOSF495		-0.636	-	-
			AOSF516		-0.903	-	-
			AOSF651		-0.699	cytoskeleton, cell adhesion	Dynein light chain roadblock-type 2
			AOSF684		-0.651	-	-
			AOSF712		-0.742	-	-
			AOSF737		-0.861	-	-
			AOSF844		-0.769	-	-
			AOSF962		-0.641	-	-
			CAON1047		-0.93	-	similar to RIKEN cDNA 4930415O20 gene [Strongylocentrotus purpuratus]
			CAON1166		-1.055	-	loc560949 protein
			CAON1202		-0.571	-	-
			CAON1380		-1.202	metabolism	Glutamine amidotransferase, class-II
			CAON1686		-0.933	-	-
			CAON1726		-1.092	-	-
			CAON1804		-0.595	-	-
			CAON1816		-1.359	-	-
			CAON1873		-1.01	-	-
			CAON779		-0.539	-	-
			CAON876		-0.778	-	high mobility group AT-hook 2 [Gallus gallus]
			CAON957		-0.725	-	-
			CAON980		-0.574	proteolysis, protein degradation	Zinc metalloproteinase nas-13
			CAOO2069		-0.696	translation, protein biosynthesis	Elongation factor 1-alpha
			CAOO2250		-0.724	-	hypothetical protein AYWB_261
			CAOO2639		-0.777	-	-
	Up	Day 1	AOSC448	1.031		apoptosis	Calreticulin
			AOSC518	0.766		-	-
			AOSC533	0.557		-	-
			AOSF1034	0.794		-	-
			AOSF1042	0.859		-	-
			AOSF1085	0.541		transport	Phospholipid scramblase 1
			AOSF1095	2.606		-	Golgi-associated plant pathogenesis-related protein 1
			AOSF1129	1.166		-	-
			AOSF1134	1.703		-	-
			AOSF1141	0.559		translation, protein biosynthesis	40S ribosomal protein S27
			AOSF1158	1.324		-	-
			AOSF1202	0.576		-	-
			AOSF1210	0.858		-	Keratinocytes-associated protein 2
			AOSF1230	0.65		-	-
			AOSF1237	0.544		-	-
			AOSF1260	0.527		-	-
			AOSF1278	0.952		transport	Protein transport protein Sec61 subunit gamma
			AOSF1307	0.52		cytoskeleton, cell adhesion	Severin
			AOSF1358	0.718		-	-
			AOSF1401	0.914		-	-
			AOSF1409	0.603		transport	Protein SEC13 homolog
			AOSF1454	0.669		-	-
			AOSF1472	1.644		-	hypothetical membrane associated protein
			AOSF1514	0.689		-	-
			AOSF1532	1.544		-	Uncharacterized protein At1g14870
			AOSF392	0.504		-	-
			AOSF453	1.02		-	-
			AOSF559	0.897		-	-
			AOSF561	0.544		-	orf2-encoded protein
			AOSF591	0.556		translation, protein biosynthesis	40S ribosomal protein S29
			AOSF618	0.616		-	Ezrin-radixin-moesin-binding phosphoprotein 50
			AOSF637	0.769		-	-
			AOSF701	0.518		-	-
			AOSF715	0.718		-	-
			AOSF745	0.579		-	-
			AOSF761	0.577		apoptosis	Proapoptotic caspase adapter protein
			AOSF779	0.608		-	-
			AOSF783	0.735		-	-
			AOSF799	0.56		-	-
			AOSF825	0.579		-	-
			AOSF868	1.262		-	-
			AOSF966	1.485		-	-
			AOSF997	0.901		response to oxidative stress	Peroxidasin-like protein
			CAON1101	0.839		response to oxidative stress	Soma ferritin
			CAON1363	0.706		metabolism	Lipase member K
			CAON1381	0.563		signaling	Guanine nucleotide-binding protein subunit beta-like protein
			CAON1397	0.75		-	-
			CAON1646	0.621		metabolism	Nucleoside diphosphate kinase B
			CAON533	0.603		translation, protein biosynthesis	Ribosomal protein S16
			CAON911	0.725		-	-
		Day 2	AOSB442		0.864	-	gem (nuclear organelle) associated protein 4
			AOSC1075		0.938	-	-
			AOSC1088		0.593	-	-
			AOSC475		0.565	translation, protein biosynthesis	40S ribosomal protein S20
			AOSC708		1.535	-	-
			AOSC807		0.686	-	-
			AOSC876		0.568	signaling	Tyrosine-protein phosphatase Lar
			AOSC957		0.929	regulation of transcription	Protein FEV
			AOSF1042		0.708	-	-
			AOSF1123		1.31	-	predicted protein
			AOSF1134		2.203	-	-
			AOSF1180		0.771	-	-
			AOSF1237		0.556	-	-
			AOSF1267		2.489	-	-
			AOSF1307		0.955	cytoskeleton, cell adhesion	Severin
			AOSF1344		1.295	-	-
			AOSF1361		0.524	apoptosis	Adenosine receptor A1
			AOSF1427		0.567	-	-
			AOSF1501		0.898	-	-
			AOSF1521		1.741	response to stress	Universal stress protein A-like protein
			AOSF399		0.695	-	-
			AOSF591		0.604	translation, protein biosynthesis	40S ribosomal protein S29
			AOSF642		1.589	transport	Major yolk protein
			AOSF799		0.734	-	-
			AOSF824		0.595	-	orf2-encoded protein
			AOSF841		0.501	translation, protein biosynthesis	60S ribosomal protein L22
			AOSF868		1.167	-	-
			AOSF964		2.733	-	-
			CAON1066		0.981	response to stress	drought-induced protein rdi
			CAON1106		0.69	-	-
			CAON1111		1.272	-	-
			CAON1441		0.609	-	-
			CAON484		0.702	-	-
			CAON999		0.65	metabolism	S-adenosylmethionine synthetase isoform type-2
			CAOO1104		1.774	cytoskeleton, cell adhesion	Actin, cytoplasmic
			CAOO2203		0.841	cytoskeleton, cell adhesion	Thymosin beta-4
			CAOO2671		0.958	apoptosis	Autophagy-related protein 16
			CAOO655		0.569	-	neurofascin homolog
			CAOO739		0.742	-	-
Mexico	Down	Day 1	AOSC1075	-0.74		-	-
			AOSC1120	-0.633		translation, protein biosynthesis	Elongation factor 1-alpha
			AOSC391	-0.799		electron transport, oxidative phophorylation	ATP synthase lipid-binding protein, mitochondrial
			AOSC414	-0.756		cytoskeleton, cell adhesion	Fimbrin
			AOSC456	-0.659		translation, protein biosynthesis	60S ribosomal protein L10
			AOSC506	-0.516		translation, protein biosynthesis	40S ribosomal protein S16
			AOSC571	-0.767		-	Lipoxygenase homology domain-containing protein 1
			AOSC708	-0.887		-	-
			AOSC807	-0.794		-	-
			AOSC987	-0.636		-	-
			AOSF1020	-0.658		-	Pancreatic secretory granule membrane major glycoprotein GP2
			AOSF1053	-0.666		proteolysis, protein degradation	Protease inhibitor I4, serpin
			AOSF1123	-0.876		-	predicted protein
			AOSF1162	-1.014		-	-
			AOSF1167	-0.687		translation, protein biosynthesis	40S ribosomal protein S3
			AOSF1234	-0.827		translation, protein biosynthesis	60S ribosomal protein L9
			AOSF1278	-0.925		transport	Protein transport protein Sec61 subunit gamma
			AOSF1338	-1.236		-	-
			AOSF1384	-0.501		-	-
			AOSF1387	-0.588		translation, protein biosynthesis	40S ribosomal protein S19
			AOSF1453	-0.601		-	-
			AOSF1463	-0.871		translation, protein biosynthesis	Ubiquitin-like protein FUBI
			AOSF1472	-1.293		-	hypothetical membrane associated protein
			AOSF1493	-0.816		translation, protein biosynthesis	40S ribosomal protein S5
			AOSF1501	-0.51		-	-
			AOSF561	-0.618		-	orf2-encoded protein
			AOSF568	-0.844		-	-
			AOSF573	-1.233		cell proliferation, growth, development	Calmodulin
			AOSF622	-0.961		DNA	Histone H2A.V (Fragment)
			AOSF731	-0.923		response to stress	Glycine-rich RNA-binding, abscisic acid-inducible protein
			AOSF761	-0.537		apoptosis	Proapoptotic caspase adapter protein
			AOSF798	-0.63		-	-
			AOSF821	-0.665		metabolism	Glutamine amidotransferase, class-II
			AOSF868	-1.003		-	-
			AOSF892	-0.519		-	-
			AOSF997	-1.143		response to oxidative stress	Peroxidasin-like protein
			CAON1397	-0.535		-	-
			CAON1556	-0.86		electron transport, oxidative phophorylation	ATP synthase lipid-binding protein, mitochondrial
			CAON1689	-0.859		transport	Acyl-CoA-binding protein
			CAON943	-0.513		electron transport, oxidative phophorylation	NADH dehydrogenase [ubiquinone] iron-sulfur protein 7, mitochondrial
			CAOO2507	-1.308		regulation of transcription	60S ribosomal protein L24
			CAOO526	-0.882		transport	Protein transport protein Sec61 subunit alpha
			CAOO642	-0.786		-	sjchgc09417 protein
			CAOO655	-0.543		-	neurofascin homolog
			CAOO861	-0.861		-	-
			CAOO916	-0.577		-	-
		Up	AOSB1002	1.005		-	-
			AOSB1012	0.94		RNA, mRNA modification	Serine/arginine repetitive matrix protein 1
			AOSB1074	0.802		-	Putative golgin subfamily A member 6-like protein 4
			AOSB442	0.67		-	gem (nuclear organelle) associated protein 4
			AOSB564	0.52		cytoskeleton, cell adhesion	Integral membrane protein DGCR2/IDD
			AOSB638	1.109		RNA, mRNA modification	Intron-binding protein aquarius
			AOSB657	1.018		signaling	Serine/threonine-protein kinase Nek10
			AOSB741	0.862		regulation of transcription	Deoxynucleotidyltransferase terminal-interacting protein 2
			AOSB771	1.368		regulation of transcription	Chromodomain-helicase-DNA-binding protein 7
			AOSB947	0.529		response to stress	Transcriptional regulator ATRX
			AOSB951	0.515		-	conserved hypothetical protein
			AOSB999	1.175		-	complement componentq subcomponent binding protein
			AOSC1006	0.606		transport	Rab3 GTPase-activating protein catalytic subunit
			AOSC1064	0.689		-	-
			AOSC1081	0.664		translation, protein biosynthesis	Proto-oncogene tyrosine-protein kinase FGR
			AOSC783	0.784		-	-
			AOSC820	0.534		-	-
			AOSC830	0.635		electron transport, oxidative phophorylation	Cytochrome c oxidase assembly protein COX11, mitochondrial
			AOSC845	0.786		-	hypothetical protein [Mus musculus]
			AOSC864	0.605		cell proliferation, growth, development	Lethal(2) giant larvae protein homolog 2
			AOSC896	0.75		-	-
			AOSC966	0.603		-	-
			AOSC999	0.602		-	-
			AOSF1082	0.648		-	-
			AOSF1156	0.549		-	-
			AOSF1165	0.848		-	-
			AOSF1169	0.837		-	-
			AOSF1209	0.596		-	unnamed protein product [Candida glabrata]
			AOSF1355	0.571		-	-
			AOSF1420	1.689		-	hypothetical protein NEMVEDRAFT_v1g155059
			AOSF1442	1.023		-	-
			AOSF397	0.757		-	-
			AOSF433	0.735		-	-
			AOSF437	0.544		-	pol-like protein
			AOSF495	0.543		-	-
			AOSF684	0.635		-	-
			AOSF744	0.527		-	-
			AOSF900	0.565		-	-
			AOSF969	0.826		cytoskeleton, cell adhesion	Myosin-VIIa
			CAON1010	0.676		-	-
			CAON1074	1.414		-	-
			CAON1341	0.65		translation, protein biosynthesis	40S ribosomal protein S2
			CAON1349	1.028		-	-
			CAON1587	0.56		-	-
			CAON1631	0.518		-	-
			CAON1632	0.503		DNA	putative reverse transcriptase [Takifugu rubripes]
			CAON1651	1.07		-	-
			CAON1810	0.7		-	-
			CAON1819	0.518		-	-
			CAON1882	0.59		-	Tetratricopeptide repeat protein 18
			CAON1885	0.64		-	-
			CAON394	0.502		-	-
			CAON417	0.532		-	-
			CAON424	0.913		-	-
			CAON464	0.536		-	-
			CAON484	0.653		-	-
			CAON500	0.548		proteolysis, protein degradation	Ubiquitin carboxyl-terminal hydrolase 24
			CAON592	0.692		-	-
			CAON623	0.799		-	-
			CAON712	0.679		-	-
			CAON719	0.708		-	-
			CAOO931	0.556		-	-
	Day 2	Down	AOSB1116		-0.608	cell proliferation, growth, development	Disks large-associated protein 5
			AOSC1015		-0.749	translation, protein biosynthesis	40S ribosomal protein S18
			AOSC1075		-0.931	-	-
			AOSC1104		-0.625	proteolysis, protein degradation	26S proteasome non-ATPase regulatory subunit 2
			AOSC391		-0.961	electron transport, oxidative phophorylation	ATP synthase lipid-binding protein, mitochondrial
			AOSC409		-0.71	-	-
			AOSC448		-0.837	apoptosis	Calreticulin
			AOSC456		-0.965	translation, protein biosynthesis	60S ribosomal protein L10
			AOSC506		-0.568	translation, protein biosynthesis	40S ribosomal protein S16
			AOSC533		-0.752	-	-
			AOSC720		-0.935	electron transport, oxidative phophorylation	mitochondrial atp synthase f chain
			AOSC944		-0.793	translation, protein biosynthesis	40S ribosomal protein S25
			AOSC980		-0.611	-	-
			AOSF1028		-0.541	-	-
			AOSF1053		-1.039	proteolysis, protein degradation	Protease inhibitor I4, serpin
			AOSF1167		-0.971	translation, protein biosynthesis	40S ribosomal protein S3
			AOSF1208		-0.708	-	-
			AOSF1222		-0.539	response to oxidative stress	Malate dehydrogenase, cytoplasmic
			AOSF1298		-0.586	-	-
			AOSF1307		-0.616	cytoskeleton, cell adhesion	Severin
			AOSF1308		-0.55	translation, protein biosynthesis	15 kDa selenoprotein
			AOSF1326		-0.78	translation, protein biosynthesis	60S ribosomal protein L13a
			AOSF1338		-0.58	-	-
			AOSF1387		-0.777	translation, protein biosynthesis	40S ribosomal protein S19
			AOSF1416		-0.99	translation, protein biosynthesis	40S ribosomal protein S4
			AOSF1447		-0.964	response to oxidative stress	Glutathione S-transferase Mu 5
			AOSF1456		-0.94	metabolism	Dihydropteridine reductase
			AOSF1463		-0.959	translation, protein biosynthesis	Ubiquitin-like protein FUBI
			AOSF1475		-0.78	apoptosis	Death-inducer obliterator 1
			AOSF1493		-0.778	translation, protein biosynthesis	40S ribosomal protein S5
			AOSF392		-0.518	-	-
			AOSF449		-0.555	-	-
			AOSF482		-0.633	-	WD40 repeat
			AOSF545		-0.659	-	predicted protein [Nematostella vectensis]
			AOSF557		-0.799	-	-
			AOSF569		-0.78	translation, protein biosynthesis	60S ribosomal protein L8
			AOSF603		-0.979	cell proliferation, growth, development	Tubulin polymerization-promoting protein family member 2
			AOSF605		-0.547	translation, protein biosynthesis	60S ribosomal protein L21
			AOSF701		-0.675	-	-
			AOSF731		-1.449	response to stress	Glycine-rich RNA-binding, abscisic acid-inducible protein
			AOSF745		-0.592	-	-
			AOSF993		-0.528	electron transport, oxidative phophorylation	Mitochondrial-processing peptidase subunit beta
			CAON1087		-0.95	electron transport, oxidative phophorylation	ATP synthase subunit b, mitochondrial
			CAON1197		-0.651	proteolysis, protein degradation	Peptidase M, neutral zinc metallopeptidases, zinc-binding site
			CAON1404		-0.655	metabolism	Alanine aminotransferase 2-like
			CAON1411		-0.865	cell proliferation, growth, development	Tubulin polymerization-promoting protein family member 2
			CAON1556		-1.023	electron transport, oxidative phophorylation	ATP synthase lipid-binding protein, mitochondrial
			CAON1748		-0.682	proteolysis, protein degradation	Ubiquitin-like protein FUBI
			CAON1901		-0.562	translation, protein biosynthesis	60S ribosomal protein L35a
			CAON781		-1.099	metabolism	RNA 3'-terminal phosphate cyclase
			CAON810		-0.607	translation, protein biosynthesis	60S ribosomal protein L35
			CAON931		-0.703	-	-
			CAON943		-1.021	electron transport, oxidative phophorylation	NADH dehydrogenase [ubiquinone] iron-sulfur protein 7, mitochondrial
			CAOO1095		-0.777	transport	Protein transport protein Sec61 subunit beta
			CAOO1970		-0.541	-	-
			CAOO410		-1.03	proteolysis, protein degradation	split hand foot malformationtype 1
			CAOO440		-1.11	electron transport, oxidative phophorylation	Cytochrome b-c1 complex subunit 6, mitochondrial
			CAOO526		-0.9	transport	Protein transport protein Sec61 subunit alpha
			CAOO902		-1.267	translation, protein biosynthesis	Elongation factor 1-alpha 2
		Up	AOSB1002		0.695	-	-
			AOSB947		0.537	response to stress	Transcriptional regulator ATRX
			AOSC1064		0.549	-	-
			AOSF1018		0.508	-	-
			AOSF1079		0.615	-	-
			AOSF1088		0.612	DNA	reverse transcriptase
			AOSF1113		1.342	-	-
			AOSF1151		0.637	DNA	similar to endonuclease/reverse transcriptase [Strongylocentrotus purpuratus]
			AOSF1272		2.602	-	-
			AOSF1287		1.874	-	-
			AOSF1322		0.787	-	-
			AOSF1323		0.507	-	-
			AOSF1365		1.015	-	-
			AOSF1405		0.996	regulation of transcription	Zinc finger, CCHC-type
			AOSF1420		2.24	-	hypothetical protein NEMVEDRAFT_v1g155059
			AOSF1503		0.729	-	-
			AOSF432		3.337	-	-
			AOSF550		2.098	response to oxidative stress	Catalase
			AOSF696		0.737	-	-
			AOSF712		0.987	-	-
			AOSF722		0.806	-	-
			AOSF796		1.375	-	-
			AOSF869		0.64	-	-
			AOSF874		0.852	-	-
			AOSF938		0.519	-	-
			AOSF997		3.902	response to oxidative stress	Peroxidasin-like protein
			CAON1202		0.709	-	-
			CAON1234		0.628	-	Coiled-coil domain-containing protein 94
			CAON1351		0.622	-	-
			CAON1380		0.854	metabolism	Glutamine amidotransferase, class-II
			CAON1415		0.839	translation, protein biosynthesis	Elongation factor 1-alpha
			CAON1521		0.8	-	-
			CAON1646		0.724	metabolism	Nucleoside diphosphate kinase B
			CAON1686		0.853	-	-
			CAON1758		0.646	-	-
			CAON1760		0.963	-	-
			CAON1782		0.872	-	-
			CAON1810		0.861	-	-
			CAON390		0.7	-	-
			CAON403		0.619	-	-
			CAON436		0.572	-	-
			CAON462		0.504	-	-
			CAON464		1.007	-	-
			CAON539		0.646	-	-
			CAON555		0.643	-	-
			CAON702		0.607	-	-
			CAON719		0.552	-	-
			CAON779		0.811	-	-
			CAON996		1.204	-	-
			CAOO1050		1.091	-	Chloramphenicol acetyltransferase
			CAOO636		0.852	transport	Epididymal secretory protein E1
			CAOO732		0.762	-	-
			CAOO931		1.277	-	-
			CAOO933		0.643	-	-
